# Supplementary material
Source: PubMed Central journal article supplement (PMC7788456)
Supplement: EMBR-22-e50827-s002.pdf [file EMBR-22-e50827-s002.pdf]

## Expanded View Figures

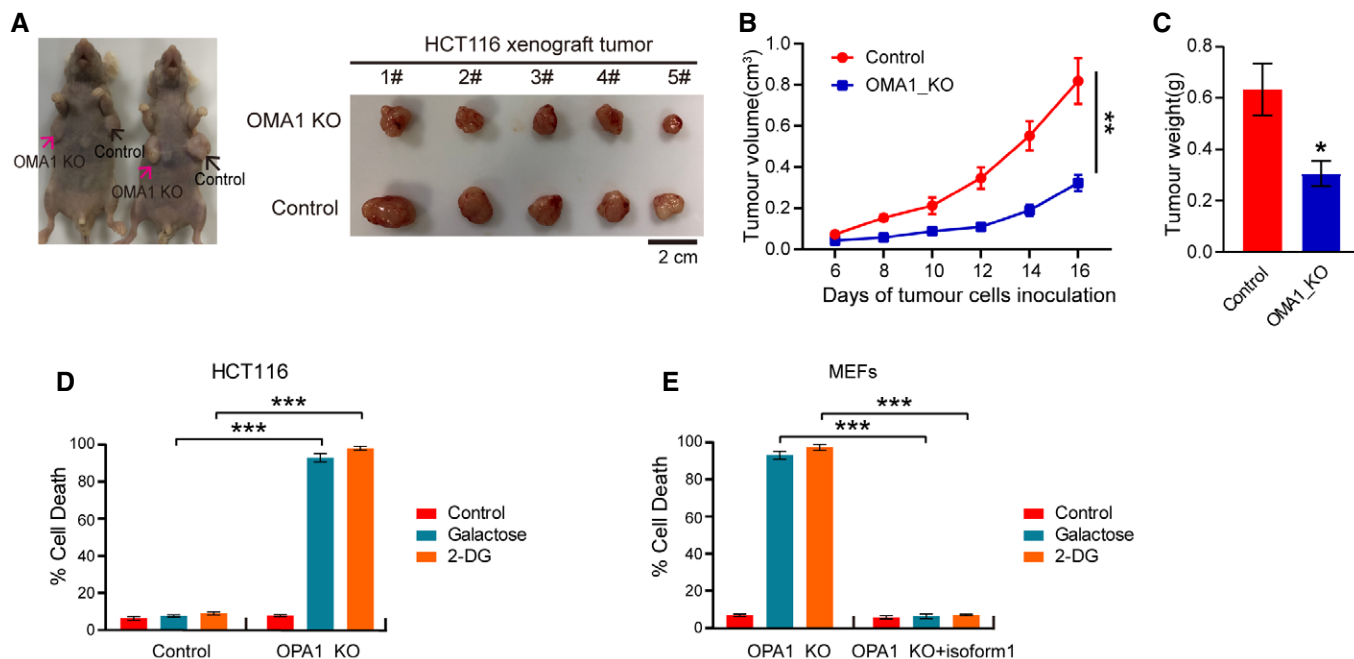

**Figure EV1. Loss of OMA1 significantly reduced colorectal tumor growth in nude mice and OPA1 deficiency makes cells more dependent on glycolysis for survival.**

A–C Control or OMA1 KO HCT116 cells ( $5 \times 10^6$ ) were injected into the flanks of nude mice. Mice were euthanized and photographed at day 16 (A). Representative photographs of tumors in nude mice were performed (A) and tumor weights were analyzed (C). The tumor sizes were measured at an interval of 6 days after injection and calculated as  $\text{width}^2 \times \text{length}/2$ . Xenograft tumor growths of control or OMA1 KO HCT116 tumors in nude mice were shown (B). Data are presented as the mean  $\pm$  SEM,  $n = 5$  biological replicates. Scale bars, 2 cm.  $P$ -values were calculated by two-way ANOVA of variance;  $*P < 0.05$ ,  $**P < 0.01$ . All experiments were repeated with three independent biological replicates.

D Control and OPA1 KO HCT116 cells were treated with glucose deprivation (galactose) or the glycolytic inhibitor (2-Deoxy-D-glucose, 2-DG, 10 mM) for 24 h. Cell deaths were quantified by cell counting with trypan blue exclusion. Error bars represent the mean  $\pm$  SD ( $n = 3$ , 300 cells per independent experiment), statistical significance was assessed by a two-way ANOVA of variance,  $***P < 0.001$ .

E OPA1-null MEFs expressing control (empty vector) or OPA1 isoform 1 were cultured with galactose or 2-DG for 48 h. Cell death was quantified by cell counting with trypan blue exclusion. Error bars represent the mean  $\pm$  SD ( $n = 3$ , 300 cells per independent experiment), statistical significance was assessed by a two-way ANOVA of variance,  $***P < 0.001$ .

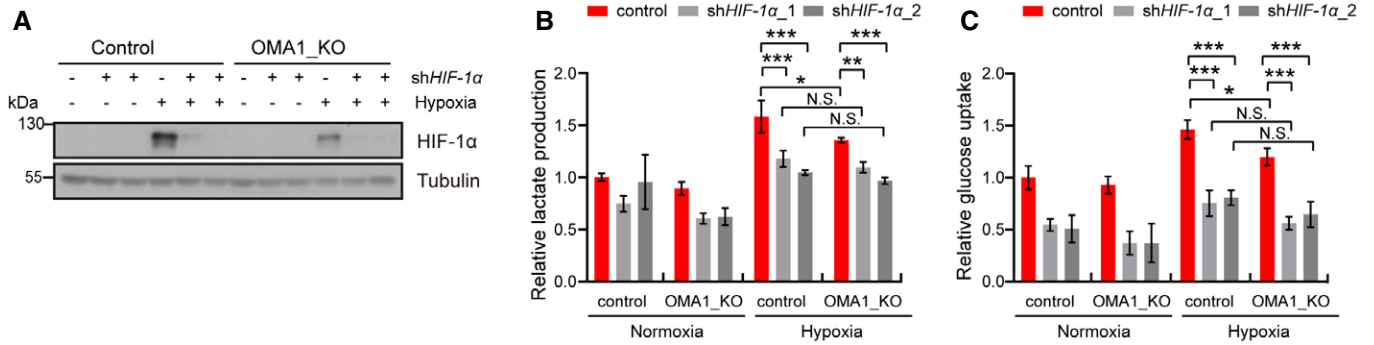

**Figure EV2. OMA1 regulates glycolysis in a HIF-1 $\alpha$  dependent manner.**

A–C Control or OMA1\_KO HCT116 cells were transfected with control, shHIF-1 $\alpha$ \_1, or shHIF-1 $\alpha$ \_2 (HIF-1 $\alpha$  knockdown) lentiviral particles. And cells were cultured in normoxia or hypoxia for 12 h. The whole cell lysates were analyzed by Western blotting with antibodies against HIF-1 $\alpha$ , Tubulin (representative data from three independent experiments) (A). The lactate production (B) and glucose uptake (C) were measured using microplate reader, and the values were normalized to the protein concentration. Error bars indicate the mean  $\pm$  SD ( $n = 4$  independent experiments), statistical significance was assessed by a two-way ANOVA. N.S., not significant, \* $P < 0.05$ , \*\*\* $P < 0.001$ .

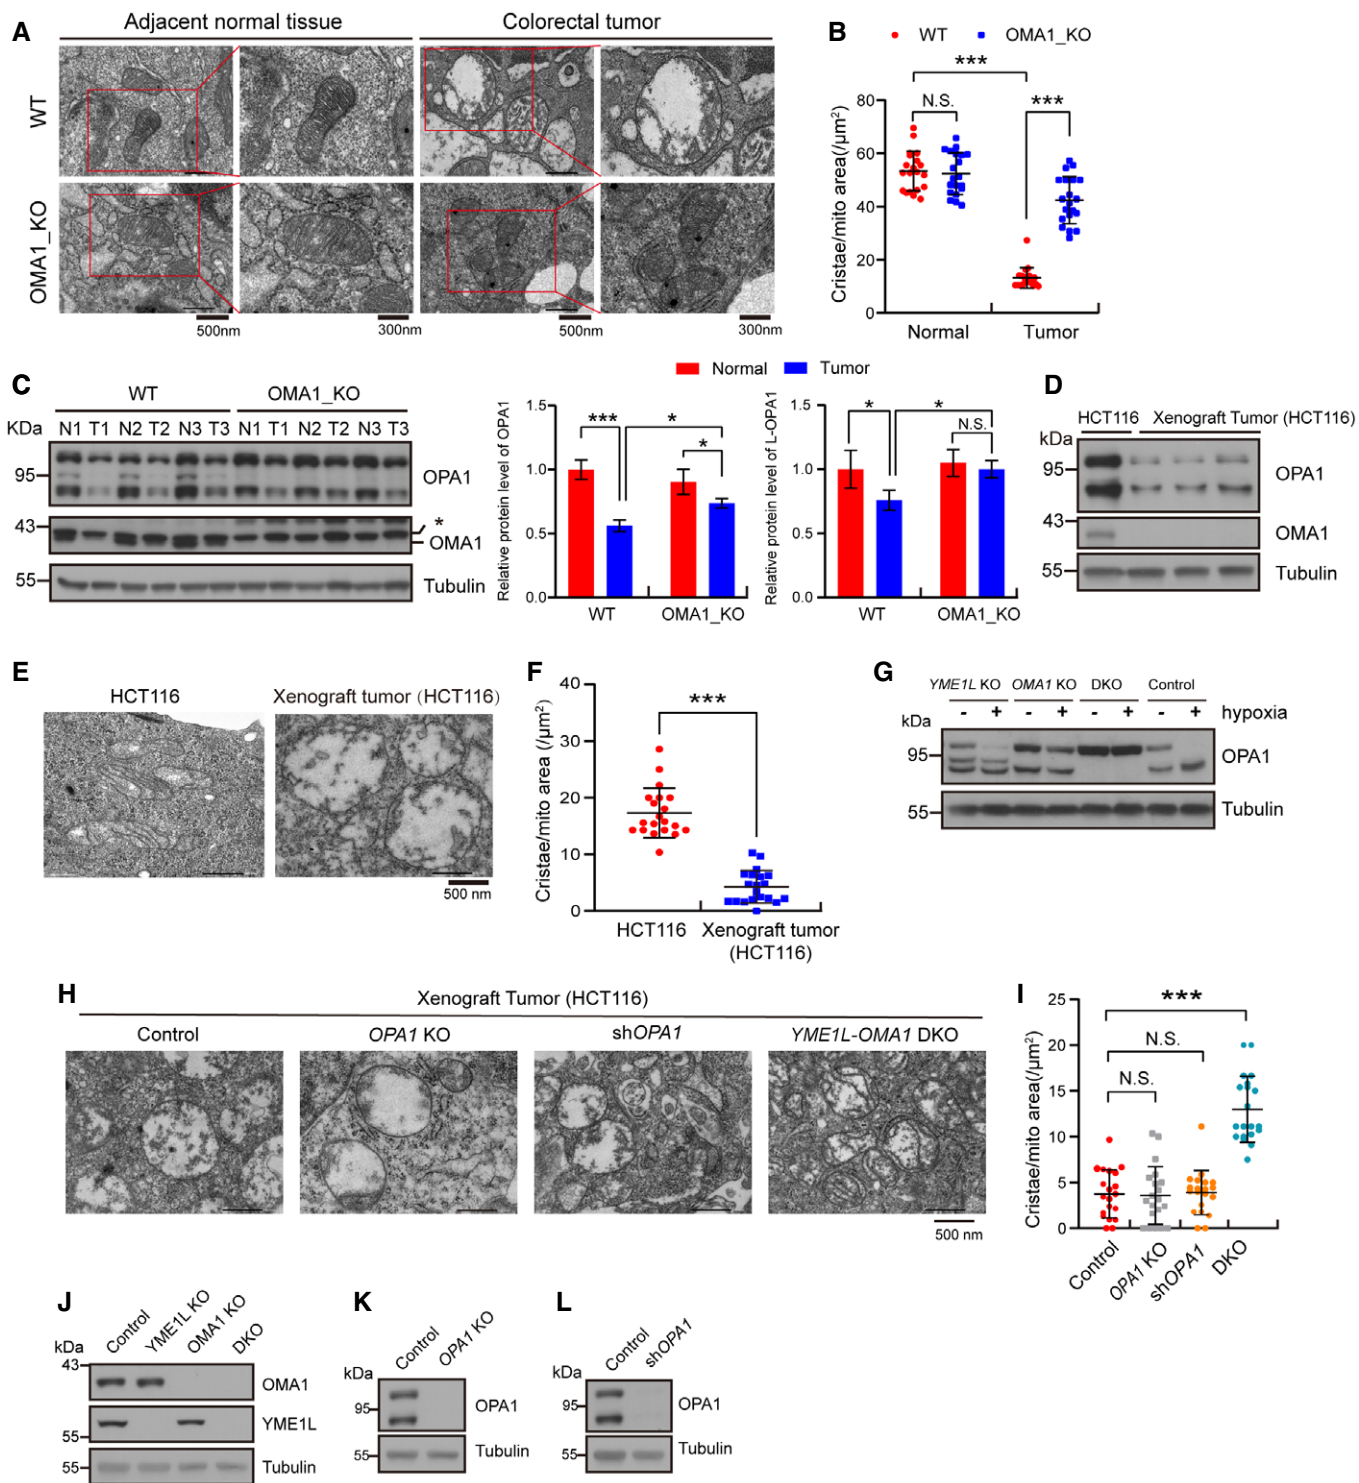

Figure EV3.

**Figure EV3. OMA1-OPA1 axis regulates mitochondrial cristae remodeling of colorectal cancer cells *in vivo*.**

- A Representative transmission electron microscopy (TEM) analysis of the colorectal tumors or adjacent normal tissues from WT or *Oma1*<sup>-/-</sup> mice.
- B Quantitative analysis of mitochondrial cristae (the ratio of cristae number to mitochondrial area) in tumor or adjacent normal tissues from WT and *Oma1*<sup>-/-</sup> mice (20 mitochondria per group, biological replicates). Statistical significance was assessed by a two-way ANOVA; error bars are presented as mean ± SD; N.S., not significant, \*\*\**P* < 0.001.
- C The lysates of the adjacent normal tissues or tumors from WT and *Oma1*<sup>-/-</sup> mice were stained with antibodies against OPA1, OMA1, or Tubulin (representative data from three independent experiments). The asterisk indicates a nonspecific band. The bands of OPA1 and L-OPA1 were further quantified by ImageJ software. Error bars indicate the mean ± SD (*n* = 3 independent experiments), statistical significance was assessed by two-way ANOVA. N.S., not significant, \**P* < 0.05, \*\*\**P* < 0.001.
- D The lysates of HCT116 cells or xenograft tumor of nude mice injected with HCT116 cells were assessed by Western blotting with anti-OPA1, or anti-OMA1, or anti-Tubulin (representative data from three independent experiments).
- E Representative TEM analysis of HCT116 cells or the xenograft tumors of nude mice injected with HCT116 cells.
- F Quantitative analysis of mitochondrial cristae (the ratio of cristae number to mitochondrial area) in HCT116 cells or the xenograft tumors of nude mice injected with HCT116 cells (20 mitochondria per group, biological replicates). Statistical significance was assessed by Student's *t*-test; error bars are presented as mean ± SD; \*\*\**P* < 0.001.
- G *YME1L*\_KO, *OMA1*\_KO, *YME1L*\_OMA1\_Double KO (DKO), and WT HCT116 cells were maintained in normoxia or hypoxia (1% O<sub>2</sub>) for 72 h. The whole cell lysates were analyzed by Western blotting with antibody against OPA1. Tubulin was used as a loading control.
- H, I Representative TEM analyzed the inside of the xenograft tumors from nude mice injected with control, *OPA1*\_KO, *shOPA1*, *YME1L*-*OMA1*-DKO HCT116 cells (H). Quantitative analysis of mitochondrial cristae (the ratio of cristae number to mitochondrial area) was further performed (I) (20 mitochondria per group, biological replicates). Statistical significance was assessed by a two-way ANOVA; error bars are presented as mean ± SD; N.S., not significant, \*\*\**P* < 0.001.
- J WT, *YME1L*\_KO, *OMA1*\_KO, and *YME1L*\_OMA1\_Double KO (DKO) HCT116 cells were analyzed by Western blotting with antibodies against OMA1, YME1L, and Tubulin.
- K, L Control and *OPA1*\_KO (K), Control and *shOPA1* (L) HCT116 cells were analyzed by Western blotting with antibodies against OPA1 and Tubulin.

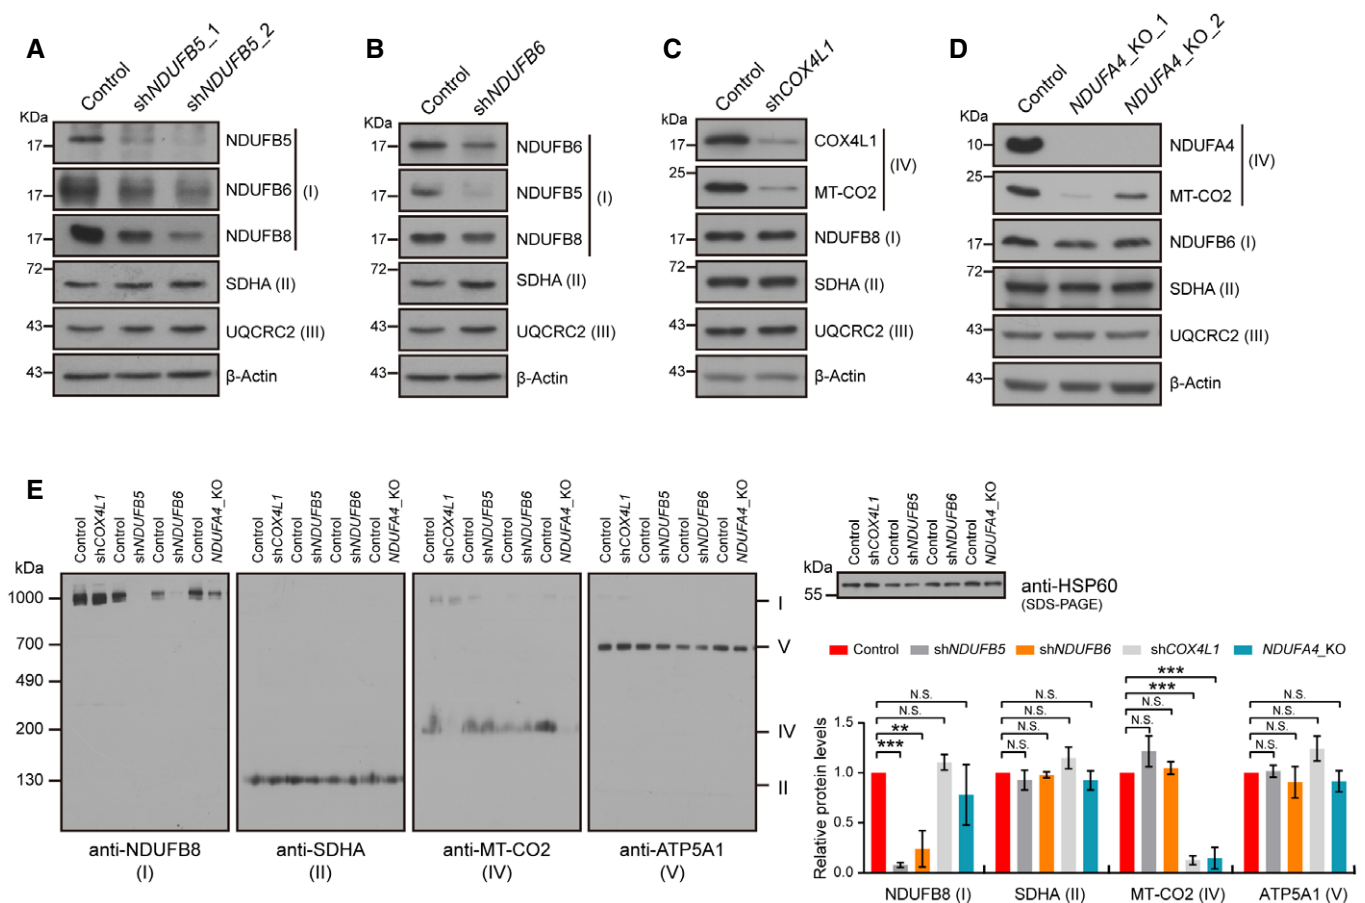

Figure EV4.

**Figure EV4. Depletion of NDUFB5, NDUFB6, COX4L1, or NDUFA4 impairs the assembly of mitochondrial respiratory chain complexes.**

- A HCT116 cells were transfected with control, shNDUFB5\_1 or shNDUFB5\_2 (NDUFB5 knockdown) lentiviral particles, and the cell lysates were assessed by Western blotting with anti-NDUFB5, anti-NDUFB6, anti-NDUFB8, anti-SDHA, anti-UQCRC2, or anti- $\beta$ -Actin. (representative data from three independent experiments).
- B HCT116 cells infected with control or shNDUFB6 (NDUFB6 knockdown) lentiviral particles were lysed and analyzed by Western blotting with antibodies against NDUFB5, NDUFB6, NDUFB8, SDHA, UQCRC2, or  $\beta$ -Actin. (representative data from three independent experiments).
- C HCT116 cells were transfected with control or shCOX4L1 (COX4L1 knockdown) lentiviral particles and the cell lysates were assessed by Western blotting with anti-COX4L1, anti-MT-CO2, anti-NDUFB8, anti-SDHA, anti-UQCRC2, or anti- $\beta$ -Actin. (representative data from three independent experiments).
- D Western blotting analysis of HCT116 control or NDUFA4 KO (NDUFA4 knockout) cell lysates with antibodies against NDUFA4, MT-CO2, NDUFB6, SDHA, UQCRC2, or  $\beta$ -Actin. (representative data from three independent experiments).
- E Mitochondria isolated from control and shCOX4L1, control and shNDUFB5, control and shNDUFB6, control and NDUFA4\_KO HCT116 cells were subjected to blue native PAGE (BN-PAGE), and respiratory chain complexes were analyzed by Western blotting with anti-NDUFB8 (Complex I), anti-SDHA (Complex II), anti-MT-CO2 (Complex IV), and anti-ATP5A1 (Complex V, ATP synthase) antibodies. SDS-PAGE with antibody against HSP60 was used as a loading control. Relative protein levels were further evaluated by densitometry analysis using ImageJ software. Error bars are presented as mean  $\pm$  SD by Student's t-test ( $n = 3$  independent experiments). N.S., not significant, \*\* $P < 0.01$ , \*\*\* $P < 0.001$ .

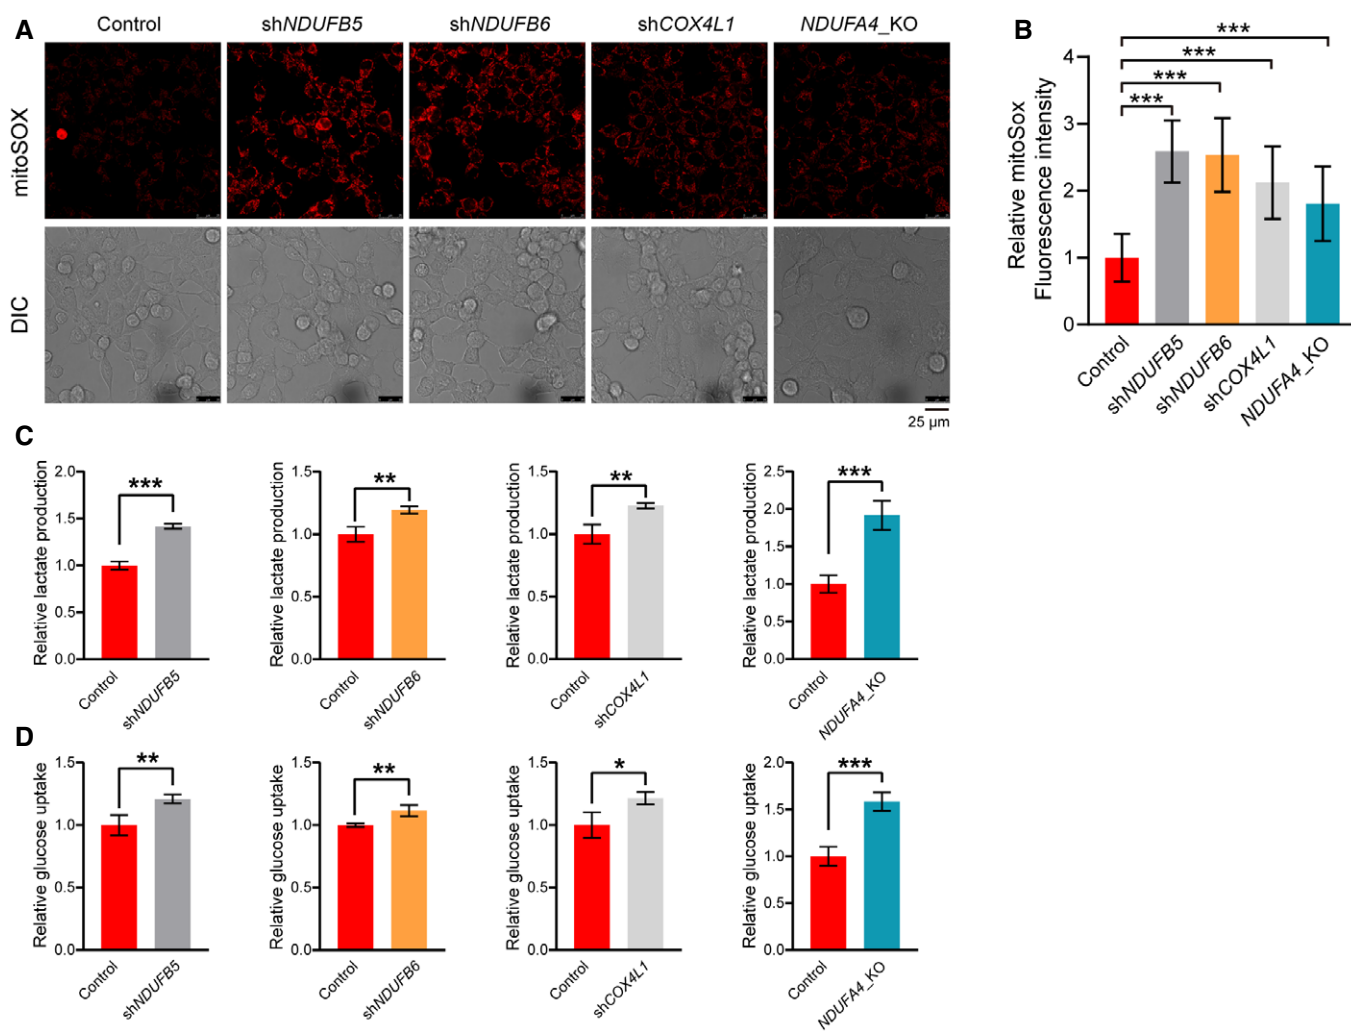

Figure EV5.

◀ **Figure EV5. Mitochondrial respiratory chain complexes component NDUFB5, NDUFB6, COX4L1, or NDUFA4 regulates mtROS generation and glycolytic metabolism.**

- A, B Control, shCOX4L1, shNDUFB5, shNDUFB6, and NDUFA4\_KO HCT116 cells were stained with mitoSOX and then analyzed by confocal microscopy (A). The fluorescence intensities of mitoSOX were analyzed by ImageJ software (B). Bars indicate the mean  $\pm$  SD of three independent experiments by Student's *t*-test, \*\*\**P* < 0.001.
- C, D Control and shCOX4L1, control and shNDUFB5, control and shNDUFB6, control and NDUFA4\_KO HCT116 cells were cultured for 24 h. The lactate production (C) and glucose uptake (D) were measured by using microplate reader, and the values were normalized to the protein concentration. Error bars indicate the mean  $\pm$  SD (*n* = 3 independent experiments), statistical significance was assessed by *t*-test, \**P* < 0.05, \*\**P* < 0.01, \*\*\**P* < 0.001.
